1

1 INFLAMMATORY MARKERS AND BODY MASS INDEX AMONG HISPANIC  
2 CHILDREN

3  
4 Henry Lang,<sup>1</sup> Elaine N. Loudermilk,<sup>2</sup> W. Andrew Clark,<sup>3</sup> Jo-Ann Marrs,<sup>4</sup> T. Andrew Joyner,<sup>5</sup>  
5 Liang Wang,<sup>6</sup> Kathryn S. Gerber,<sup>7</sup> Arsham Alamian<sup>7</sup>

6  
7 <sup>1</sup>Department of Exercise Physiology, University of Mary, Bismarck, ND, United States of  
8 America

9 <sup>2</sup>Public Health, 4<sup>th</sup> Medical Group, Seymour Johnson Air Force Base, NC, United States of  
10 America.

11 <sup>3</sup>College of Clinical and Rehabilitative Health Sciences, East Tennessee State University,  
12 Johnson City, TN, United States of America

13 <sup>4</sup>College of Nursing, East Tennessee State University, Johnson City, TN, United States of  
14 America

15 <sup>5</sup>Department of Geosciences, College of Arts & Sciences, East Tennessee State University,  
16 Johnson City, TN, United States of America

17 <sup>6</sup>Robbins College of Health and Human Sciences, Baylor University, Waco, TX, United States of  
18 America

19 <sup>7</sup>School of Nursing and Health Studies, University of Miami, Coral Gables, FL, United States of  
20 America

21

22

23 Corresponding Author: Arsham Alamian, PhD, MSc, FACE, FRSPH

24 Email: [arsham.alamian@miami.edu](mailto:arsham.alamian@miami.edu)

25 Table number: 3

26 Word Count: 2,343

27 Conflict of Interest: None declared

28

## 29 **Abstract**

### 30 **Background and Objectives**

31 Body mass index (BMI) is inversely proportional with adiponectin levels among adults, while  
32 insulin, C-reactive protein (CRP), interleukin 6 (IL-6), resistin, and tumor necrosis factor-alpha  
33 (TNF- $\alpha$ ) have been linked with elevated BMI. The role and relation of these biomarkers with  
34 BMI among Hispanic pediatric populations are less known. Thus, the objective of this cross-  
35 sectional study was to examine the association of inflammatory markers with the odds of  
36 overweight/obesity while controlling for several sociodemographic factors among a Hispanic  
37 youth population of Northeast Tennessee.

### 38 **Methods**

39 Height, weight, demographic information, and blood samples were collected from 107 Hispanic  
40 children aged 2 to 10 years recruited at a large community health center in 2015-2016 in  
41 Northeast Tennessee. Data for this research were accessed and analyzed in 2022. Multivariable  
42 logistic regression was conducted to assess the relations between adiponectin, insulin, resistin,  
43 CRP, TNF- $\alpha$ , and IL-6, and overweight/obesity vs. having a healthy (normal) weight.

### 44 **Results**

45 Adiponectin levels were significantly lower among overweight/obese Hispanic children ( $p =$   
46 0.0048) compared to healthy weight children. The odds of overweight/obesity decreased by 4%  
47 for every one-unit increase in serum adiponectin. Insulin levels were significantly higher among  
48 overweight/obese Hispanic children ( $p = 0.0048$ ) compared to healthy weight children  
49 ( $p=0.0008$ ). The odds of overweight/obesity increased by 7% for every one-unit increase in

3

50 serum insulin. Resistin, IL-6, TNF- $\alpha$ , and CRP were not significantly associated with  
51 overweight/obesity in this population.

## 52 **Conclusion**

53 Adiponectin behaves similarly in Hispanic youth as it does in other pediatric populations,  
54 possibly making it a valuable marker when examining metabolic health status in this population.

55

56

## 57 **Introduction**

58       The prevalence of obesity among youth ages 2 to 19 years old in the United States (U.S.)  
59 increased from 17.7% in 2011-2012 to 21.5% in 2017-2020. [1] Hispanic populations and groups  
60 identified as having a low socioeconomic status (SES) are at higher risk for obesity.[2–4]  
61 Increasing prevalence of obesity in the children is concerning due to the shared relationship of  
62 childhood and adult obesity; children with obesity are at a greater risk to have obesity during  
63 adulthood than children with normal weight.[5,6] Obesity in turn increases risk for metabolic  
64 conditions, atherosclerosis, stroke, sleep apnea, respiratory disorders, and certain cancers as an  
65 individual ages.[5,6] The development of atherosclerotic lesions on vascular walls also leads to  
66 atherosclerosis which is a major contributor to cardiovascular disease.[7] The atherogenic  
67 process can begin in early childhood and remain throughout life.[7] Risk for developing  
68 atherosclerosis and additional complications due to obesity can be monitored by tracking specific  
69 physiological biomarkers.

70       Previous studies have shown body mass index (BMI) to be inversely proportional with  
71 adiponectin levels among adults and children.[8,9] Increased levels of adiponectin have been  
72 associated with a reduction in glycogenolysis, due to increased uptake of glucose by adipose  
73 tissue,[10] and hepatic gluconeogenesis. The downregulation of hepatic gluconeogenesis is  
74 coupled with an increase in fatty acid  $\beta$ -oxidation, suggesting an increase in energy  
75 expenditure.[11] Insulin is a negative regulator of gluconeogenesis and chronically elevated  
76 levels are associated with a reduction in adiponectin.[12] Treatment with adiponectin in rats  
77 demonstrated an increase in insulin-stimulated glucose uptake in adipose tissue through the  
78 upregulation of adenosine monophosphate protein kinase (AMPK), reducing the phosphorylation  
79 of p70 S6 kinase, which acts as an inhibitor.[13] Conversely, C-reactive protein (CRP),

80 interleukin 6 (IL-6), resistin, and tumor necrosis factor-alpha (TNF- $\alpha$ ) are associated with  
81 elevated BMI and inflammation. These markers have also been linked to increased risk for  
82 developing atherosclerotic lesions and have been found to be inversely proportional to  
83 adiponectin.[14–16] The relationship between adiponectin and BMI among children has been  
84 explored, highlighting a negative correlation between adiposity and adiponectin.[17,18]  
85 However, there remains a gap in the literature regarding the relationship of adiponectin, CRP,  
86 IL-6, resistin, and TNF- $\alpha$  with BMI among Hispanic children. Thus, the objective of this study  
87 was to examine the association between inflammatory markers and the likelihood of being  
88 overweight/obese while controlling for sociodemographic factors within Hispanic youth in  
89 Northeast Tennessee.

## 90 **Methods**

### 91 **Participants**

92 Secondary analysis of height, weight, demographic information, and blood samples from  
93 114 Hispanic children aged two to ten years recruited in 2015-2016 at a large community health  
94 center in Northeast Tennessee, as part of a larger study on metabolic syndrome,[19] were  
95 completed. Data for this article were accessed for research purposes and analyzed from  
96 September to December 2022. Of the 114 children considered, 1 was excluded due to having a  
97 BMI below the 5<sup>th</sup> percentile (i.e., underweight), 2 had missing data on maternal education, and 4  
98 had missing information on TNF- $\alpha$ , resistin and adiponectin. The final analytic sample size  
99 comprised of 107 children. Methods for the collection of data used are mentioned elsewhere in a  
100 study conducted by Alamian et al.[19] The authors did not have access to information that could  
101 identify individual participants during or after data collection.

102 This study received approval from the East Tennessee State University Human Subject  
103 Research Ethics Committee (IRB#: 0414.16s). Written consent was obtained from all study  
104 participants.

## 105 **Dependent variable**

106 The outcome of interest, BMI status (obese defined as overweight/obese vs. healthy  
107 weight, according to 2000 CDC growth charts),[20] was treated as a categorical variable.

## 108 **Independent variables**

109 The variables of interest included adiponectin ( $\mu\text{g/mL}$ ), insulin (uIU.L), resistin (pg/mL),  
110 TNF- $\alpha$ (pg/mL), CRP (mg/dL), and IL-6 (pg/mL). Analysis for adiponectin (171A7002M),  
111 insulin and resistin (171A7001M), and TNF- $\alpha$  and IL-6 (171A7002M) were performed using  
112 Bio-Rad Bio-Plex Mag-Pix according to provider procedures. East Tennessee State University  
113 Clinical Laboratory: an accredited reference lab (Center for Medicare & Medicaid Services  
114 Clinical Laboratory, certification number 44D0659180) was utilized for analysis of serum CRP.

## 115 **Covariates**

116 Covariates included child age, child sex (male or female), maternal education level (high  
117 school graduation or more vs. less than high school education), maternal marital status (married  
118 versus other). Child age was reported as a continuous variable in years.

## 119 **Statistical analysis**

120 Descriptive statistics (frequencies and percentages for categorical variables, and means  
121 and standard deviations for continuous variables) were performed to describe the data as  
122 appropriate. Pearson chi-squared test and independent *t*-tests were conducted to examine  
123 differences in percentages (for categorical variables) and means (for continuous variables) by

124 weight status (overweight/obese versus healthy weight status). Simple and multiple logistic  
125 regression analyses were then performed to assess the strength of association between variables  
126 of interest and being overweight/obese versus healthy weight among participants in this  
127 population. Multiple logistic regression models controlled for the potential effects of covariates  
128 (age, sex, maternal education, maternal marital status). Statistical analysis was completed via  
129 statistical analyst system (SAS, version 9.4; SAS Institute, Cary, NC).

## 130 **Results**

131 The majority of the study sample were female (54.21%) with an average age of 6.62  
132 years (SD: 2.74 years) as seen in Tables 1 and 2. Almost half of the sample were classified as  
133 overweight/obese (44.86%) with the remaining sample having a healthy weight status (55.14%).  
134 Slightly over half of mothers had less than a high school education (56.07%) and most were  
135 married (78.50%). A greater percentage of males (48.98%) were overweight/obese compared to  
136 females (41.38%), although this difference was not statistically significant. There were no  
137 statistically significant differences in weight status by maternal education or marital status ( $P >$   
138 0.05). Average levels of biomarkers were as follows: Adiponectin, 24.27  $\mu\text{g/mL}$  (SD=13.85);  
139 insulin, 16.03 uIU.L (SD=17.46); resistin, 5510.23 pg/mL (SD=3817.13); TNF- $\alpha$ , 8.40 pg/mL  
140 (SD=17.00); CRP, 2.35 mg/dL (SD: 4.86); and IL-6, 3.23 pg/mL (SD=8.68).

141 **Table 1. Sociodemographic characteristics of the Hispanic pediatric sample by healthy and**  
142 **overweight/obese weight status (n = 107).<sup>a</sup>**

|                    | <b>N (%)<br/>Total</b> | <b>Healthy<br/>Weight</b> | <b>Overweight/Obese</b> | <b>P-<br/>value<sup>b</sup></b> |
|--------------------|------------------------|---------------------------|-------------------------|---------------------------------|
| <b>n, %, Total</b> | 107<br>(100.00)        | 59 (55.14)                | 48 (44.86)              |                                 |
| <b>Sex, n (%)</b>  |                        |                           |                         | 0.4310                          |
| Male               | 49 (45.79)             | 25 (51.02)                | 24 (48.98)              |                                 |
| Female             | 58 (54.21)             | 34 (58.62)                | 24 (41.38)              |                                 |

|                                       |            |            |            |        |
|---------------------------------------|------------|------------|------------|--------|
| <b>Maternal education, n (%)</b>      |            |            |            | 0.6711 |
| Less than high school education       | 60 (56.07) | 32 (53.33) | 28 (46.67) |        |
| High school graduate or more          | 47 (43.93) | 27 (57.45) | 20 (42.55) |        |
| <b>Maternal marital status, n (%)</b> |            |            |            | 0.2044 |
| Married                               | 84 (78.50) | 49 (58.33) | 35 (41.67) |        |
| Other                                 | 23 (21.50) | 10 (43.48) | 13 (56.52) |        |

143 a. Data from a study of metabolic syndrome in Hispanic children in Johnson City, TN [19].

144 b. P-value from the chi-squared test.

145 **Table 2. Mean (SD) for child age and selected biomarkers by healthy weight and**

146 **overweight/obese weight status among the Hispanic pediatric sample (N=107).<sup>a</sup>**

|                            | Healthy Weight (N=59) |           | Overweight/Obese (N=48) |           | P-value <sup>b</sup> |
|----------------------------|-----------------------|-----------|-------------------------|-----------|----------------------|
|                            | Mean                  | Std. Dev. | Mean                    | Std. Dev. |                      |
| Child age (years)          | 6.39                  | 2.75      | 6.90                    | 2.73      | 0.3446               |
| Adiponectin (ug/mL)        | 27.53                 | 15.37     | 20.27                   | 10.56     | 0.0048               |
| Insulin (uIU.L)            | 10.61                 | 9.94      | 22.70                   | 22.00     | 0.0008               |
| Resistin (pg/mL)           | 4916.50               | 2387.40   | 6240.00                 | 4984.10   | 0.0961               |
| TNF-alpha (pg/mL)          | 8.18                  | 13.23     | 8.67                    | 20.88     | 0.8877               |
| C-reactive protein (mg/dL) | 2.33                  | 5.48      | 2.38                    | 4.01      | 0.9626               |
| Interleukin 6 (pg/mL)      | 3.73                  | 10.47     | 2.62                    | 5.84      | 0.4888               |

147 a. Data from a study of metabolic syndrome in Hispanic children in Johnson City, TN [19].

148 b. P-value from t-test.

149

150 Results from the independent *t*-tests for differences in biomarkers by weight status are

151 shown in Table 2. Adiponectin levels were significantly lower among overweight/obese children

152 compared to healthy children ( $p = 0.0048$ ). Insulin levels were significantly higher among

153 overweight/obese children compared to healthy children ( $p=0.0008$ ). No other significant

154 differences were observed between overweight/obese and healthy children when considering

155 other biomarkers or the child's age.



156 Simple logistic regression (SLR) and multiple logistic regression (MLR) results are  
 157 presented in Table 3. In SLR models, both adiponectin and insulin were significantly associated  
 158 with being overweight/obese. For every one-unit increase in serum adiponectin, the child's odds  
 159 of overweight/obesity decreased by 4% [Odds Ratio (OR): 0.96, 95% confidence interval (95%  
 160 CI): 0.93-0.99, P=0.0084]. In contrast, every one-unit increase in insulin resulted in 7%  
 161 increased chance of overweight/obesity [OR: 1.07, 95% CI: 1.03-1.11, 0.0017. MLR results  
 162 corroborated the SLR findings: both adiponectin and insulin were found to be significantly  
 163 associated with overweight/obesity. For every one-unit increase in serum adiponectin, the odds  
 164 of overweight/obesity decreased by 4% (OR: 0.96, 95% CI: 0.93-0.99) while holding all other  
 165 variables constant. For every one-unit increase in insulin, the odds of overweight/obesity  
 166 increased by 7% (OR): 1.07, (95% CI): 1.02-1.13. Child age, child sex, maternal education and  
 167 marital status, and other biomarkers (resistin, IL-6, TNF- $\alpha$ , and CRP) were not significantly  
 168 associated with overweight/obesity.

**Table 3. Simple and multiple logistic regression examining the relationship between biomarkers and overweight/obesity in a Hispanic pediatric sample from Northeast TN (N=107)**

| Variables                            | SLR       |           |         | MLR       |           |         |
|--------------------------------------|-----------|-----------|---------|-----------|-----------|---------|
|                                      | OR        | 95 % CI   | P-value | OR        | 95 % CI   | P-value |
| Adiponectin (ug/mL)                  | 0.96      | 0.93-0.99 | 0.0084  | 0.96      | 0.93-0.99 | 0.0104  |
| Insulin (uIU.L)                      | 1.07      | 1.03-1.11 | 0.0017  | 1.07      | 1.02-1.13 | 0.0052  |
| Resistin (ug/mL)                     | 1.00      | 1.00-1.00 | 0.1000  | 1.00      | 1.00-1.00 | 0.0477  |
| TNF-alpha (pg/mL)                    | 1.00      | 0.98-1.02 | 0.8813  | 1.01      | 0.95-1.08 | 0.6748  |
| C-reactive protein (mg/dL)           | 1.00      | 0.93-1.08 | 0.9632  | 0.99      | 0.90-1.09 | 0.8879  |
| Interleukin 6 (pg/mL)                | 0.98      | 0.93-1.04 | 0.5235  | 0.91      | 0.75-1.09 | 0.2867  |
| <b>Child sex</b>                     |           |           |         |           |           |         |
| Female vs male                       | 0.735     | 0.34-1.59 | 0.4314  | 0.71      | 0.28-1.82 | 0.3041  |
| <b>Child age (years, continuous)</b> | 1.28      | 0.58-2.83 | 0.3415  | 0.82      | 0.31-2.13 | 0.8268  |
| <b>Maternal education level</b>      |           |           |         |           |           |         |
| High school education or less        | Reference |           |         | Reference |           |         |

|                                |      |           |        |      |           |        |
|--------------------------------|------|-----------|--------|------|-----------|--------|
| High school graduate or more   | 0.85 | 0.39-1.83 | 0.6712 | 0.67 | 0.27-1.70 | 0.4310 |
| <b>Maternal marital status</b> |      |           |        |      |           |        |
| Other vs married               | 1.82 | 0.72-4.62 | 0.2077 | 1.58 | 0.53-4.70 | 0.4592 |

169

## 170 **Discussion**

171 Results of this study indicate that both adiponectin and insulin levels are potentially  
172 significant predictors of childhood overweight/obesity. Adiponectin is still protective against  
173 increased weight even when accounting for insulin. Results from this study confirm findings  
174 from similar studies that demonstrated significantly lower adiponectin levels in Italian and Pima  
175 Native American children with overweight/obese classification using BMI.[17,18] The repeated  
176 findings of low adiponectin in overweight/obese children may be related to the relationship  
177 between adiponectin and insulin. Depressed adiponectin concentration and chronically elevated  
178 insulin have been demonstrated in the pathogenesis of insulin resistance, and therefore metabolic  
179 syndrome.[21,22] The depressed levels of adiponectin found in overweight/obese children,  
180 coupled with participant age and the lack of significant differences between groups in the other  
181 biomarkers examined, suggests adiponectin levels may be an early indicator to predict risk of  
182 developing insulin resistance and metabolic syndrome in children. While BMI has also been used  
183 as an early predictor of metabolic syndrome in children,[23] research output is increasing  
184 regarding metabolically healthy (MHO) vs metabolically unhealthy (MUO) individuals with  
185 obesity, shifting the focus of intervention trials towards improved metabolic health status as the  
186 desired outcome rather than weight loss. Alterations in BMI are not required following life-style  
187 intervention for metabolic health to improve.[24,25] Adiponectin may be a valuable variable to  
188 monitor when tracking the effects an individual's BMI may have on their metabolic health (i.e.,  
189 if an individual has high adiponectin and elevated BMI, there may be less of concern for weight-

190 loss intervention).[26] Longitudinal studies controlling for BMI while monitoring insulin  
191 sensitivity and adiponectin in children are needed to confirm this hypothesis.

192         The lack of significance of resistin, CRP, IL-6, and TNF- $\alpha$  between the normal BMI and  
193 overweight/obese groups may be due, in part, to the pathological progression of obesity. The  
194 infiltration of inflammatory cells into adipocytes is thought to occur after a decrease in  
195 adiponectin,[27] suggesting that duration of overweight/obesity is a key factor in the progression  
196 of chronic inflammation. The participants in the current study may not have had  
197 overweight/obesity for a sufficient length of time to illicit the inflammatory consequences  
198 typically associated with obesity in adulthood.[28] Previous research regarding resistin levels in  
199 the adult population is mixed with some researchers finding greater values in individual's with  
200 obesity compared to those with healthy weight, whereas other findings demonstrated  
201 significantly greater resistin levels in populations with obesity.[29,30] Other literature has  
202 demonstrated the capabilities of CRP, IL-6, and TNF- $\alpha$  to predict overweight/obesity.[31] The  
203 findings from the current study indicates adiponectin may be an earlier predictor for the risk of  
204 developing insulin resistance compared to CRP, IL-6, and TNF- $\alpha$  in a pediatric population.  
205 Further research in the Hispanic pediatric population is required to confirm the findings of the  
206 current study.

207         The adjusted analysis in this study suggests a negative association between maternal  
208 education and BMI, however findings were not significant. Previous research has demonstrated  
209 parental education to be a predictor of child overweight/obese status in countries with a high  
210 economic status. Lê-Scherban and colleagues (2021) revealed childhood obesity prevalence to be  
211 greater among children whose parents did not obtain a high school education compared to  
212 children with parents who had a college degree.[32] Ogden and colleagues (2018) found

213 childhood obesity prevalence to be significantly lower in Hispanic US households when the head  
214 of the household was a college graduate compared to a high school graduate or less. [33]The  
215 current study examined the effect of childhood obesity between non-high school graduates to  
216 high school graduates or higher, which may elicit a smaller effect on childhood obesity when  
217 compared to the effect of non-high school graduates to college graduates.

218 This study is limited by a small sample size, possibly leading to a lack of statistical  
219 power. However, significance was still found despite the limited sample size indicating the  
220 relationships uncovered should be studied further. Furthermore, the cross-sectional study aided  
221 in determining associations to allow for future studies to expand on the present findings. The  
222 current study alone, however, is not enough to determine causation, thus longitudinal research  
223 are warranted. Finally, the sample population is of a specific region in Tennessee where obesity  
224 is known to be prevalent,[34] thus additional studies should seek to examine similar populations  
225 in urban, suburban, and rural settings to improve external validity.

## 226 **Conclusion**

227 In summary, this study revealed adiponectin behaves similarly in Hispanic children as it  
228 does among adults potentially making it a valuable marker when examining health status among  
229 Hispanic pediatric populations. CRP, IL-6, and TNF- $\alpha$  may not be relevant markers to predict  
230 overweight/obese status in Hispanic youth, as these markers may not become consistently  
231 elevated until an individual has maintained overweight/obese status for an extended length of  
232 time. Longitudinal studies are needed to confirm the findings relating Hispanic youth BMI to  
233 adiponectin, CRP, IL-6, and TNF- $\alpha$ . Additional research using larger sample sizes is needed to  
234 confirm the relationship between biomarkers and BMI among Hispanic youth.

## 235 **References**

- 236 1. Hu K, Staiano AE. Trends in Obesity Prevalence Among Children and Adolescents Aged  
237 2 to 19 Years in the US From 2011 to 2020. *JAMA Pediatr* [Internet]. 2022 Oct 1 [cited  
238 2023 Jul 3];176(10):1037–9. Available from:  
239 <https://jamanetwork.com/journals/jamapediatrics/fullarticle/2794534>
- 240 2. Alexander AG, Grant WL, Pedrino KJ, Lyons PE. A prospective multifactorial  
241 intervention on subpopulations of predominately hispanic children at high risk for obesity.  
242 *Obesity* [Internet]. 2014 Jan 1 [cited 2021 Jul 1];22(1):249–53. Available from:  
243 [www.obesityjournal.org](http://www.obesityjournal.org)
- 244 3. Hales CM, Carroll MD, Fryar CD, Ogden CL. Prevalence of Obesity Among Adults and  
245 Youth: United States, 2015-2016 Key findings Data from the National Health and  
246 Nutrition Examination Survey [Internet]. 2015 [cited 2021 Jan 5]. Available from:  
247 [https://www.cdc.gov/nchs/data/databriefs/db288\\_table.pdf#1](https://www.cdc.gov/nchs/data/databriefs/db288_table.pdf#1).
- 248 4. Rogers R, Eagle TF, Sheetz A, Woodward A, Leibowitz R, Song M, et al. The  
249 Relationship between Childhood Obesity, Low Socioeconomic Status, and Race/Ethnicity:  
250 Lessons from Massachusetts. *Child Obes* [Internet]. 2015 Dec 1 [cited 2021 Jan  
251 5];11(6):691–5. Available from: [/pmc/articles/PMC4939441/?report=abstract](https://pubmed.ncbi.nlm.nih.gov/26111111/)
- 252 5. Bhadoria A, Sahoo K, Sahoo B, Choudhury A, Sufi N, Kumar R. Childhood obesity:  
253 Causes and consequences. *J Fam Med Prim Care* [Internet]. 2015 [cited 2021 Jan  
254 5];4(2):187. Available from: [/pmc/articles/PMC4408699/?report=abstract](https://pubmed.ncbi.nlm.nih.gov/26111111/)
- 255 6. Wang Y, Lim H, Lim & H. International Review of Psychiatry The global childhood  
256 obesity epidemic and the association between socio-economic status and childhood  
257 obesity The global childhood obesity epidemic and the association between socio-

- 258 economic status and childhood obesity. 2012 [cited 2021 Jan 5]; Available from:  
259 <https://www.tandfonline.com/action/journalInformation?journalCode=iirp20>
- 260 7. Mangge H, Almer G, Truschnig-Wilders M, Schmidt A, Gasser R, Fuchs D.  
261 Inflammation, Adiponectin, Obesity and Cardiovascular Risk. *Curr Med Chem*. 2011 Jan  
262 8;17(36):4511–20.
- 263 8. Asayama K, Hayashibe H, Dobashi K, Uchida N, Nakane T, Kodera K, et al. Decrease in  
264 Serum Adiponectin Level Due to Obesity and Visceral Fat Accumulation in Children.  
265 2003.
- 266 9. Reinehr T, Roth C, Menke T, Andler W. Adiponectin before and after Weight Loss in  
267 Obese Children. *J Clin Endocrinol Metab* [Internet]. 2004 Aug 1 [cited 2021 Jan  
268 22];89(8):3790–4. Available from: [https://academic.oup.com/jcem/article-](https://academic.oup.com/jcem/article-lookup/doi/10.1210/jc.2003-031925)  
269 [lookup/doi/10.1210/jc.2003-031925](https://academic.oup.com/jcem/article-lookup/doi/10.1210/jc.2003-031925)
- 270 10. Achari AE, Jain SK. Adiponectin, a Therapeutic Target for Obesity, Diabetes, and  
271 Endothelial Dysfunction. *Int J Mol Sci* 2017, Vol 18, Page 1321 [Internet]. 2017 Jun 21  
272 [cited 2022 Jun 23];18(6):1321. Available from: [https://www.mdpi.com/1422-](https://www.mdpi.com/1422-0067/18/6/1321/htm)  
273 [0067/18/6/1321/htm](https://www.mdpi.com/1422-0067/18/6/1321/htm)
- 274 11. Fruebis J. Proteolytic cleavage product of 30-kDa adipocyte complement-related protein  
275 increases fatty acid oxidation in muscle and causes weight loss in mice. *Proc Natl Acad*  
276 *Sci* [Internet]. 2001 Feb 13 [cited 2021 Jan 20];98(4):2005–10. Available from:  
277 [www.pnas.org/cgi/doi/10.1073/pnas.041591798](http://www.pnas.org/cgi/doi/10.1073/pnas.041591798)
- 278 12. Zhou H, Song X, Briggs M, Violand B, Salsgiver W, Gulve EA, et al. Adiponectin  
279 represses gluconeogenesis independent of insulin in hepatocytes. *Biochem Biophys Res*  
280 *Commun*. 2005 Dec 16;338(2):793–9.

- 281 13. Wang C, Mao X, Wang L, Liu M, Wetzel MD, Guan KL, et al. Adiponectin sensitizes  
282 insulin signaling by reducing p70 S6 kinase-mediated serine phosphorylation of IRS-1. *J*  
283 *Biol Chem* [Internet]. 2007 Mar 16 [cited 2021 Jan 21];282(11):7991–6. Available from:  
284 <http://www.jbc.org/article/S0021925820638066/fulltext>
- 285 14. Choi HY, Kim S, Yang SJ, Yoo HJ, Seo JA, Kim SG, et al. Association of adiponectin,  
286 resistin, and vascular inflammation: Analysis with 18F-fluorodeoxyglucose positron  
287 emission tomography. *Arterioscler Thromb Vasc Biol* [Internet]. 2011 Apr [cited 2021 Jan  
288 21];31(4):944–9. Available from:  
289 <https://www.ahajournals.org/doi/10.1161/ATVBAHA.110.220673>
- 290 15. Kobashi C, Urakaze M, Kishida M, Kibayashi E, Kobayashi H, Kihara S, et al.  
291 Adiponectin inhibits endothelial synthesis of interleukin-8. *Circ Res* [Internet]. 2005 Dec  
292 9 [cited 2021 Jan 21];97(12):1245–52. Available from:  
293 <https://www.ahajournals.org/doi/10.1161/01.RES.0000194328.57164.36>
- 294 16. Ouchi N, Kihara S, Funahashi T, Nakamura T, Nishida M, Kumada M, et al. Reciprocal  
295 association of C-reactive protein with adiponectin in blood stream and adipose tissue.  
296 *Circulation* [Internet]. 2003 Feb 11 [cited 2021 Jan 21];107(5):671–4. Available from:  
297 <https://www.ahajournals.org/doi/10.1161/01.CIR.0000055188.83694.B3>
- 298 17. Cambuli VM, Cristina Musiu M, Incani M, Paderi M, Serpe R, Marras V, et al.  
299 Assessment of Adiponectin and Leptin as Biomarkers of Positive Metabolic Outcomes  
300 after Lifestyle Intervention in Overweight and Obese Children. 2008; Available from:  
301 <https://academic.oup.com/jcem/article/93/8/3051/2598632>
- 302 18. Stefan N, Bunt JC, Salbe AD, Funahashi T, Matsuzawa Y, Tataranni PA. Plasma  
303 Adiponectin Concentrations in Children: Relationships with Obesity and Insulinemia

- 304 Clinical Diabetes and Nutrition Section (N. 2002; Available from:  
305 <https://academic.oup.com/jcem/article/87/10/4652/2846679>
- 306 19. Alamian A, Marrs JA, Clark WA, Thomas KL, Peterson JM. CTRP3 and serum  
307 triglycerides in children aged 7-10 years. PLoS One [Internet]. 2020 Dec 1 [cited 2021 Jun  
308 8];15(12 December):e0241813. Available from:  
309 <https://doi.org/10.1371/journal.pone.0241813>
- 310 20. About Child & Teen BMI | Healthy Weight, Nutrition, and Physical Activity | CDC  
311 [Internet]. [cited 2021 Jul 13]. Available from:  
312 [https://www.cdc.gov/healthyweight/assessing/bmi/childrens\\_bmi/about\\_childrens\\_bmi.ht](https://www.cdc.gov/healthyweight/assessing/bmi/childrens_bmi/about_childrens_bmi.html)  
313 [ml](https://www.cdc.gov/healthyweight/assessing/bmi/childrens_bmi/about_childrens_bmi.html)
- 314 21. Erdmann J, Kallabis B, Oppel U, Sypchenko O, Wagenpfeil S, Schusdziarra V.  
315 Development of hyperinsulinemia and insulin resistance during the early stage of weight  
316 gain. Am J Physiol Metab [Internet]. 2008 Mar [cited 2021 Apr 28];294(3):E568–75.  
317 Available from: <https://www.physiology.org/doi/10.1152/ajpendo.00560.2007>
- 318 22. Balsan GA, Da Costa Vieira JL, De Oliveira AM, Portal VL. Relationship between  
319 adiponectin, obesity and insulin resistance. Rev Assoc Med Bras [Internet]. 2015  
320 Jan 1 [cited 2022 Jun 24];61(1):72–80. Available from:  
321 <http://www.scielo.br/j/ramb/a/SP5WL5B8N3fGcZqB4kFFXDg/abstract/?lang=en>
- 322 23. Ferreira AP, Ferreira CB, Brito CJ, Gondim Pitanga FJ, Moraes CF, Naves LA, et al.  
323 Prediction of Metabolic Syndrome in Children through Anthropometric Indicators.
- 324 24. Da Silva MAR, Baptista LC, Neves RS, De França E, Loureiro H, Lira FS, et al. The  
325 Effects of Concurrent Training Combining Both Resistance Exercise and High-Intensity  
326 Interval Training or Moderate-Intensity Continuous Training on Metabolic Syndrome.



- 327 Front Physiol. 2020 Jun 11;11.
- 328 25. Ortega FB, Lee DC, Katzmarzyk PT, Ruiz JR, Sui X, Church TS, et al. The intriguing  
329 metabolically healthy but obese phenotype: Cardiovascular prognosis and role of fitness.  
330 Eur Heart J. 2013;34(5):389–97.
- 331 26. Smith GI, Mittendorfer B, Klein S. Metabolically healthy obesity: facts and fantasies. J  
332 Clin Invest [Internet]. 2019 Oct 1 [cited 2022 Jun 24];129(10):3978–89. Available from:  
333 <https://doi.org/10.1172/JCI129186>.
- 334 27. Ohashi K, Parker JL, Ouchi N, Higuchi A, Vita JA, Gokce N, et al. Adiponectin promotes  
335 macrophage polarization toward an anti-inflammatory phenotype. J Biol Chem. 2010 Feb  
336 26;285(9):6153–60.
- 337 28. Abdullah A, Stoelwinder J, Shortreed S, Wolfe R, Stevenson C, Walls H, et al. The  
338 duration of obesity and the risk of type 2 diabetes. Public Health Nutr [Internet]. 2011 Jan  
339 [cited 2022 Jun 24];14(1):119–26. Available from:  
340 [https://www.cambridge.org/core/journals/public-health-nutrition/article/duration-of-](https://www.cambridge.org/core/journals/public-health-nutrition/article/duration-of-obesity-and-the-risk-of-type-2-diabetes/3B2EB9BDB34582604AE3EFA7766A729C)  
341 [obesity-and-the-risk-of-type-2-diabetes/3B2EB9BDB34582604AE3EFA7766A729C](https://www.cambridge.org/core/journals/public-health-nutrition/article/duration-of-obesity-and-the-risk-of-type-2-diabetes/3B2EB9BDB34582604AE3EFA7766A729C)
- 342 29. Silha J V, Krsek M, Skrha J V, Sucharda P, Nyomba BLG, Murphy LJ. Plasma resistin,  
343 adiponectin and leptin levels in lean and obese subjects: Correlations with insulin  
344 resistance. Eur J Endocrinol [Internet]. 2003 [cited 2021 Apr 29];149(4):331–5. Available  
345 from: [www.eje.org](http://www.eje.org)
- 346 30. Mabrouk R, Ghareeb H, Shehab A, Omar K, El-Kabarity RH, Soliman DA, et al. Serum  
347 visfatin, resistin and IL-18 in A group of Egyptian obese diabetic and non diabetic  
348 individuals. Egypt J Immunol. 2013;20(1):1–11.
- 349 31. Dandona P, Aljada A, Bandyopadhyay A. Inflammation: The link between insulin

- 350 resistance, obesity and diabetes. Vol. 25, Trends in Immunology. Elsevier Ltd; 2004. p. 4–  
351 7.
- 352 32. Lê-Scherban F, Moore J, Headen I, Utidjian L, Zhao Y, Forrest CB. Are there birth cohort  
353 effects in disparities in child obesity by maternal education? Int J Obes [Internet]. 2021  
354 Mar 1 [cited 2021 May 4];45(3):599–608. Available from:  
355 <https://doi.org/10.1038/s41366-020-00724-y>
- 356 33. Ogden CL, Carroll MD, Fakhouri TH, Hales CM, Fryar CD, Li X, et al. Prevalence of  
357 Obesity Among Youths by Household Income and Education Level of Head of Household  
358 — United States 2011–2014. MMWR Morb Mortal Wkly Rep [Internet]. 2018 Feb 16  
359 [cited 2021 Jul 1];67(6):186–9. Available from: [/pmc/articles/PMC5815488/](https://pubmed.ncbi.nlm.nih.gov/30111111/)
- 360 34. Inc P, Cecil Sheps Center for Health Services Research the G, Appalachian Regional  
361 Commission the. Executive Summary About the Appalachian Region Measuring Health  
362 Disparities in the Appalachian Region Key Findings Trends Next Steps.  
363
